# Supplementary material
Source: MDPI journal article supplement (https://www.mdpi.com/2077-0472/10/12/647)
Supplement: s1 [file s1]

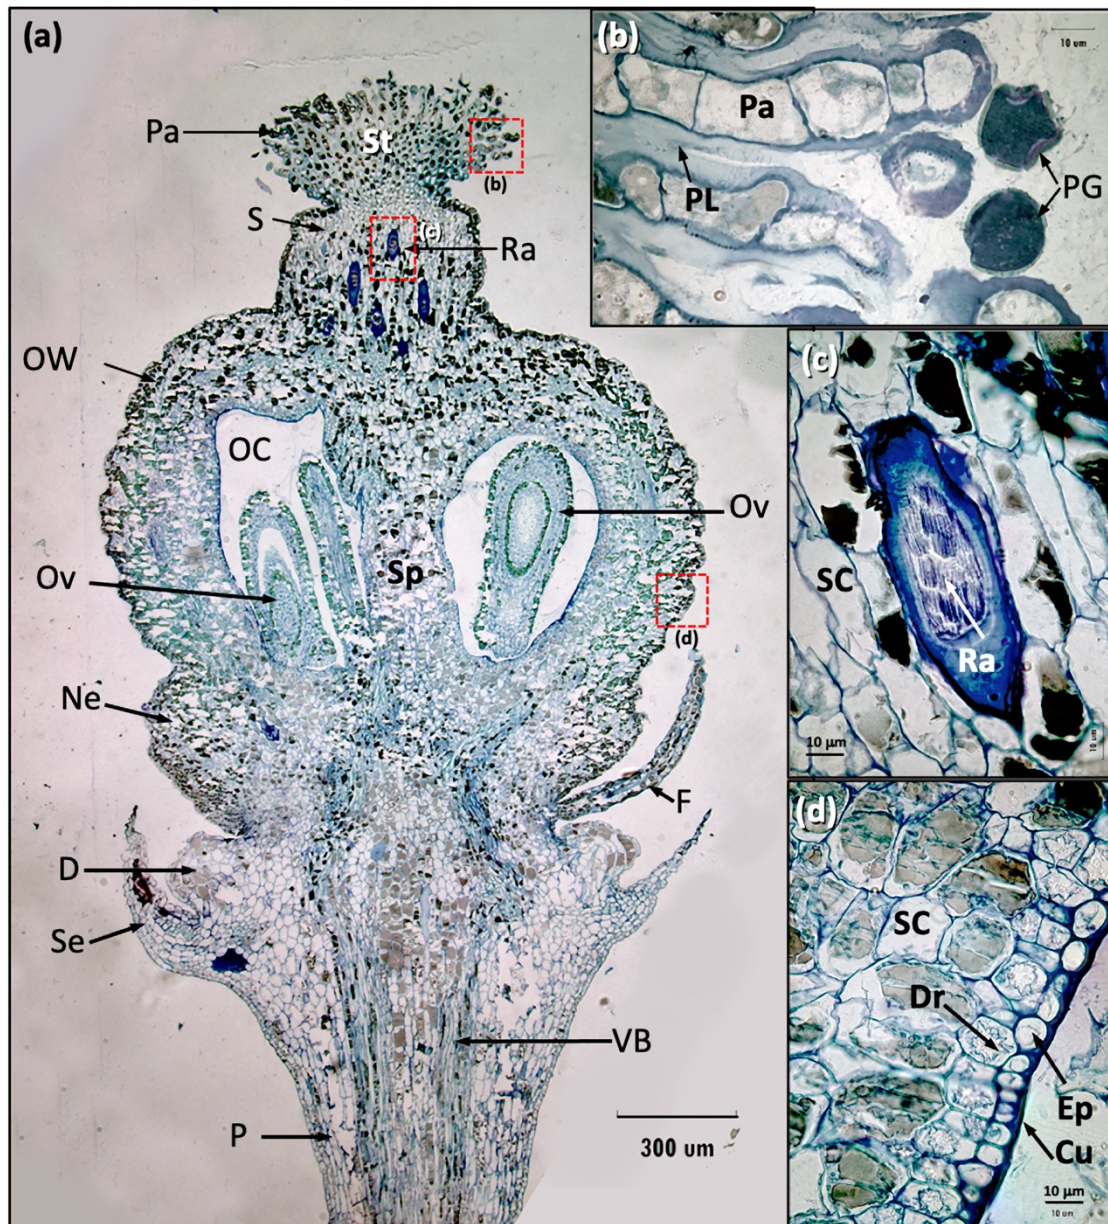

**SM3:** Longitudinal toluidine blue-stained semi-thin section (1-2 μm) of a Macabeo flower. a) Flower structure, the details (red square marking) are magnified: papillae on stigma with visible secretion covering cell wall and pollen grains (b), raphids in cells of style (c), style epidermis, subepidermal tissue with druses, and the parenchymal cells (d). Abbreviations. Cu, cuticle; D, discus; Dr, druses; Ep, epidermis; F, filament; Ne, nectary; O, ovary; OC, ovary cavity; Ov, ovule; OW, ovary wall; P, peduncle; Se, septum; Pa, papillae; PG, pollen grain; PL, pellicle layer; Ra, raphide; S, style; SC, stylar cells; Se, sepals; Sp, septum; St, stigma; VB, vascular bundle.
