# Supplementary material
Source: MDPI journal article supplement (https://www.mdpi.com/2077-0472/10/12/647)
Supplement: s1 [file s1]

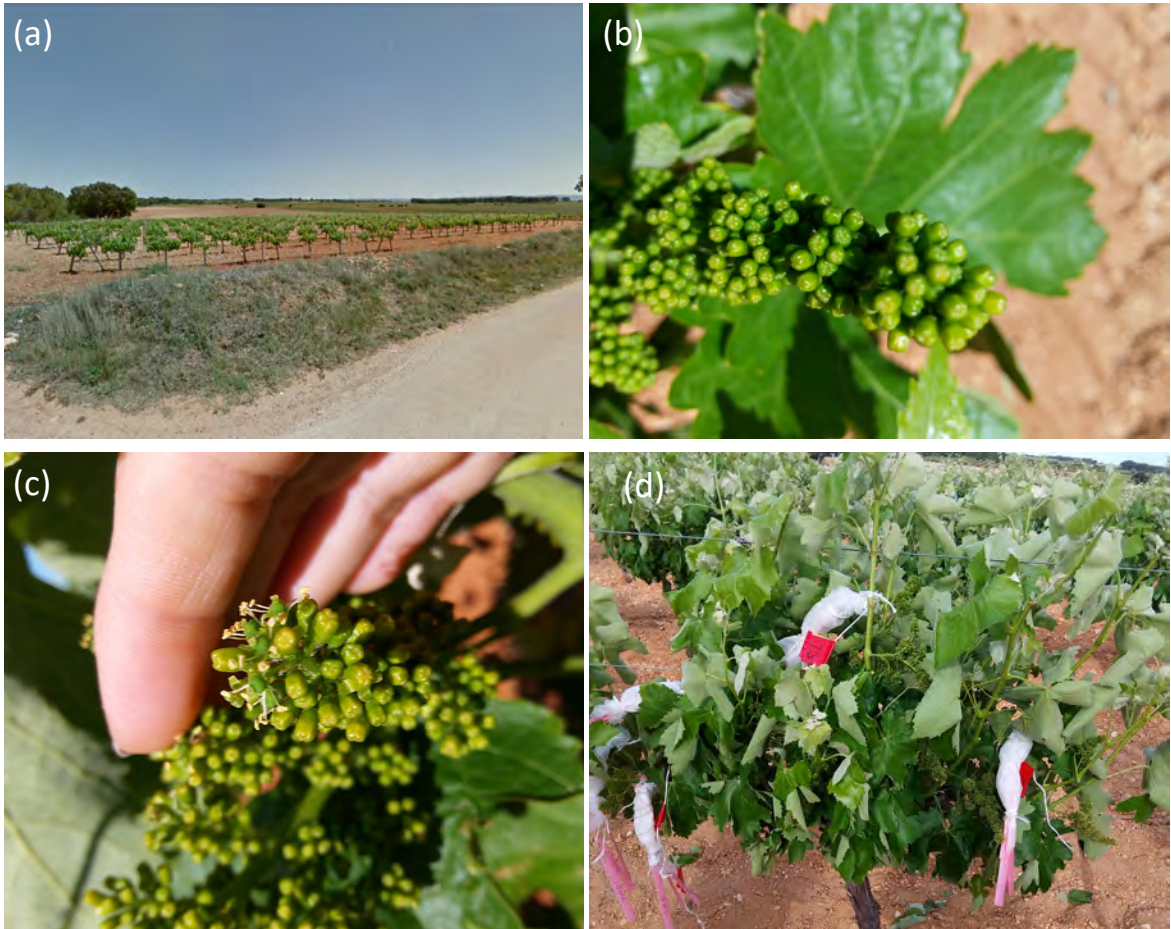

**SM1.** (a) General view of the plot where the experiments were performed. (b) Detail of an inflorescence where calypters still present (c) Detail of an inflorescence where the calypters begin to fall. (d) View of a vine with bagged inflorescences after emasculation and cross-pollination treatments.
