# Supplementary material
Source: MDPI journal article supplement (https://www.mdpi.com/2077-0472/10/12/647)
Supplement: s1 [file s1]

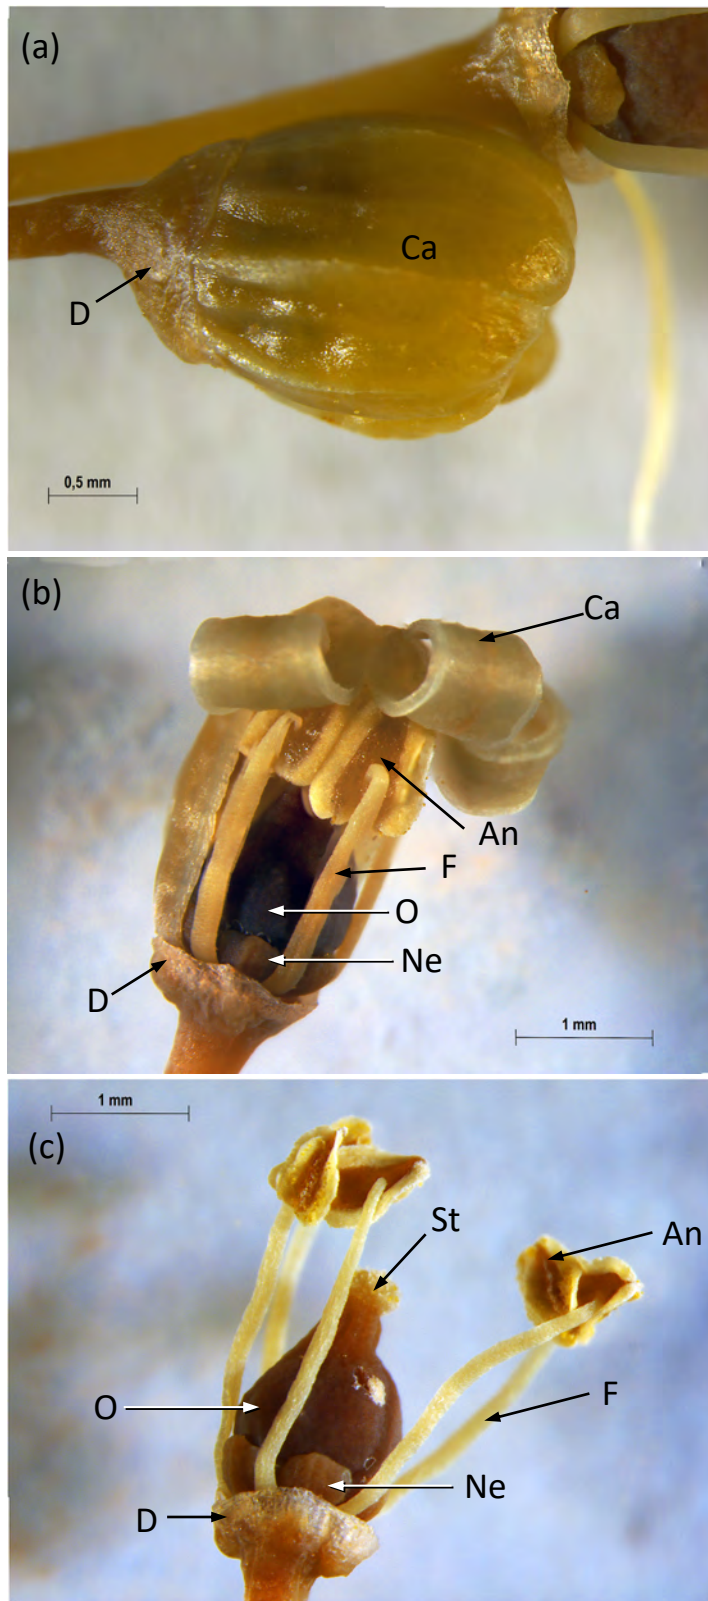

**SM2.** Macabeo flower at different stages of development. (a) Immature flower with petals forming a cap or calyptra. (b) Flower with folded petals forming a calyptra at the top. (c) Flower without the calyptra removed by stamens, anthers at anthesis. Abbreviations: An, anther; Ca, calyptra; D, discus; F, filament; Ne, nectary; O, ovary; St, stigma.
